# Supplementary material
Source: HighWire-hosted journal article supplement (http://www.qdcxjkg.com/highwire/filestream/113153/field_highwire_adjunct_files/1/Supplementary_Table_1.pdf)
Supplement: Supplementary_Table_1.pdf [file Supplementary_Table_1.pdf]

## Human BALF Proteome

| IPI         | Entrez Gene ID | Gene Symbol | Gene Name                                                            |
|-------------|----------------|-------------|----------------------------------------------------------------------|
| IPI00644018 | 1              | A1BG        | ALPHA-1-B GLYCOPROTEIN                                               |
| IPI00465313 | 2              | A2M         | ALPHA-2-MACROGLOBULIN                                                |
| IPI00021428 | 58             | ACTA1       | ACTIN, ALPHA 1, SKELETAL MUSCLE                                      |
| IPI00008603 | 59             | ACTA2       | ACTIN, ALPHA 2, SMOOTH MUSCLE, AORTA                                 |
| IPI00021439 | 60             | ACTB        | ACTIN, BETA                                                          |
| IPI00022434 | 213            | ALB         | ALBUMIN                                                              |
| IPI00218914 | 216            | ALDH1A1     | ALDEHYDE DEHYDROGENASE 1 FAMILY, MEMBER A1                           |
| IPI00465439 | 226            | ALDOA       | ALDOLASE A, FRUCTOSE-BISPHOSPHATE                                    |
| IPI00022426 | 259            | AMBP        | ALPHA-1-MICROGLOBULIN/BIKUNIN PRECURSOR                              |
| IPI00646265 | 276            | AMY1C       | AMYLASE, ALPHA 1C; SALIVARY                                          |
| IPI00021447 | 280            | AMY2B       | AMYLASE, ALPHA 2B; PANCREATIC                                        |
| IPI00334627 | 304            | ANXA2P2     | ANNEXIN A2 PSEUDOGENE 2                                              |
| IPI00021841 | 335            | APOA1       | APOLIPOPROTEIN A-I                                                   |
| IPI00298828 | 350            | APOH        | APOLIPOPROTEIN H (BETA-2-GLYCOPROTEIN I)                             |
| IPI00045508 | 64651          | AXUD1       | AXIN1 UP-REGULATED 1                                                 |
| IPI00166729 | 563            | AZGP1       | ALPHA-2-GLYCOPROTEIN 1, ZINC                                         |
| IPI00004656 | 567            | B2M         | BETA-2-MICROGLOBULIN                                                 |
| IPI00291410 | 92747          | C20ORF114   | CHROMOSOME 20 OPEN READING FRAME 114                                 |
| IPI00025699 | 128653         | C20ORF141   | CHROMOSOME 20 OPEN READING FRAME 141                                 |
| IPI00164623 | 718            | C3          | COMPLEMENT COMPONENT 3                                               |
| IPI00032258 | 720            | C4A         | COMPLEMENT COMPONENT 4A (RODGERS BLOOD GROUP)                        |
| IPI00103067 | 828            | CAPS        | CALCYPHOSINE                                                         |
| IPI00012011 | 1072           | CFL1        | COFILIN 1 (NON-MUSCLE)                                               |
| IPI00291262 | 1191           | CLU         | CLUSTERIN                                                            |
| IPI00305477 | 1469           | CST1        | CYSTATIN SN                                                          |
| IPI00479050 | 1576           | CYP3A4      | CYTOCHROME P450, SUBFAMILY IIIA (NIPHEDIPINE OXIDASE), POLYPEPTIDE 3 |
| IPI00164895 | 1551           | CYP3A7      | CYTOCHROME P450, FAMILY 3, SUBFAMILY A, POLYPEPTIDE 7                |
| IPI00736860 | 2003           | ELK2P1      | ELK2, MEMBER OF ETS ONCOGENE FAMILY, PSEUDOGENE 1                    |
| IPI00479359 | 7430           | EZR         | EZRIN                                                                |
| IPI00382606 | 2155           | F7          | COAGULATION FACTOR VII (SERUM PROTHROMBIN CONVERSION ACCELERATOR)    |
| IPI00073772 | 2203           | FBP1        | FRUCTOSE-1,6-BISPHOSPHATASE 1                                        |
| IPI00410469 | 389012         | FLJ42986    | FLJ42986 PROTEIN                                                     |
| IPI00219018 | 2597           | GAPDH       | GLYCERALDEHYDE-3-PHOSPHATE DEHYDROGENASE                             |
| IPI00555812 | 2638           | GC          | GROUP-SPECIFIC COMPONENT (VITAMIN D BINDING PROTEIN)                 |
| IPI00026314 | 2934           | GSN         | GELSOLIN (AMYLOIDOSIS, FINNISH TYPE)                                 |
| IPI00219757 | 2950           | GSTP1       | GLUTATHIONE S-TRANSFERASE PI                                         |
| IPI00478493 | 3240           | HP          | HAPTOGLOBIN                                                          |
| IPI00022371 | 3273           | HRG         | HISTIDINE-RICH GLYCOPROTEIN                                          |
| IPI00003865 | 3312           | HSPA8       | HEAT SHOCK 70KDA PROTEIN 8                                           |
| IPI00383164 | 3493           | IGHA1       | IMMUNOGLOBULIN HEAVY CONSTANT ALPHA 1                                |
| IPI00399007 | 3501           | IGHG2       | IMMUNOGLOBULIN HEAVY CONSTANT GAMMA 2 (G2M MARKER)                   |
| IPI00642082 | 3502           | IGHG3       | IMMUNOGLOBULIN HEAVY CONSTANT GAMMA 3 (G3M MARKER)                   |
| IPI00550640 | 3503           | IGHG4       | IMMUNOGLOBULIN HEAVY CONSTANT GAMMA 4 (G4M MARKER)                   |

|             |        |           |                                                              |
|-------------|--------|-----------|--------------------------------------------------------------|
| IPI00168728 | 3492   | IGHM      | IMMUNOGLOBULIN HEAVY LOCUS                                   |
| IPI00178926 | 3512   | IGJ       | IMMUNOGLOBULIN J POLYPEPTIDE                                 |
| IPI00550996 | 3514   | IGKC      | IMMUNOGLOBULIN KAPPA CONSTANT                                |
| IPI00419424 | 28299  | IGKV1-5   | IMMUNOGLOBULIN KAPPA VARIABLE 1-5                            |
| IPI00026197 | 28908  | IGKV4-1   | IMMUNOGLOBULIN KAPPA VARIABLE 4-1                            |
| IPI00154742 | 3535   | IGL@      | IMMUNOGLOBULIN LAMBDA LOCUS                                  |
| IPI00032328 | 3827   | KNG1      | KININOGEN 1                                                  |
| IPI00220327 | 3848   | KRT1      | KERATIN 1 (EPIDERMOLYTIC HYPERKERATOSIS)                     |
| IPI00009865 | 3858   | KRT10     | KERATIN 10                                                   |
| IPI00376379 | 374454 | KRT1B     | KERATIN 1B                                                   |
| IPI00299145 | 286887 | KRT6E     | KERATIN 6E                                                   |
| IPI00019359 | 3857   | KRT9      | KERATIN 9 (EPIDERMOLYTIC PALMOPLANTAR KERATODERMA)           |
| IPI00010471 | 3936   | LCP1      | LYMPHOCYTE CYTOSOLIC PROTEIN 1 (L-PLASTIN)                   |
| IPI00219217 | 3945   | LDHB      | LACTATE DEHYDROGENASE B                                      |
| IPI00023673 | 3959   | LGALS3BP  | LECTIN, GALACTOSIDE-BINDING, SOLUBLE, 3 BINDING PROTEIN      |
| IPI00003734 | 347701 | LOC347701 | CALGIZZARIN-LIKE                                             |
| IPI00737435 | 643386 | LOC643386 | SIMILAR TO ACTIN, ALPHA 2, SMOOTH MUSCLE, AORTA              |
| IPI00248321 | 643997 | LOC643997 | SIMILAR TO PEPTIDYLPROLYL ISOMERASE A ISOFORM 1              |
| IPI00739464 | 646821 | LOC646821 | SIMILAR TO CYTOPLASMIC BETA-ACTIN                            |
| IPI00738905 | 648749 | LOC648749 | SIMILAR TO PANCREATIC ALPHA-AMYLASE PRECURSOR (PA)           |
| IPI00739237 | 653879 | LOC653879 | SIMILAR TO COMPLEMENT C3                                     |
| IPI00298860 | 4057   | LTF       | LACTOTRANSFERRIN                                             |
| IPI00414609 | 4477   | MSMB      | MICROSEMINOPROTEIN, BETA-                                    |
| IPI00103397 | 4586   | MUC5AC    | MUCIN 5, SUBTYPES A AND C, TRACHEOBRONCHIAL/GASTRIC          |
| IPI00056319 | 85409  | NKD2      | NAKED CUTICLE HOMOLOG 2 (DROSOPHILA)                         |
| IPI00022429 | 5004   | ORM1      | MUCIN 5, SUBTYPES A AND C, TRACHEOBRONCHIAL/GASTRIC          |
| IPI00022488 | 5171   | PDR       | OROSOMUCOID 1                                                |
| IPI00216691 | 5216   | PFN1      | PIGMENT DISORDER, RETICULATE                                 |
| IPI00004573 | 5284   | PIGR      | SERPIN PEPTIDASE INHIBITOR, CLADE A, MEMBER 1                |
| IPI00022974 | 5304   | PIP       | PROLACTIN-INDUCED PROTEIN                                    |
| IPI00008494 | 5344   | PLGLA1    | PLASMINOGEN-LIKE A1                                          |
| IPI00736146 | 5478   | PPIA      | PEPTIDYLPROLYL ISOMERASE A (CYCLOPHILIN A)                   |
| IPI00022420 | 5950   | RBP4      | RETINOL BINDING PROTEIN 4, PLASMA                            |
| IPI00014048 | 6035   | RNASE1    | RIBONUCLEASE, RNASE A FAMILY, 1 (PANCREATIC)                 |
| IPI00398728 | 94137  | RP1L1     | RETINITIS PIGMENTOSA 1-LIKE 1                                |
| IPI00553177 | 5265   | SERPINA1  | SERPIN PEPTIDASE INHIBITOR, CLADE A , MEMBER 1               |
| IPI00010303 | 6318   | SERPINB4  | SERPIN PEPTIDASE INHIBITOR, CLADE B (OVALBUMIN), MEMBER 3    |
| IPI00165421 | 462    | SERPINC1  | SERPIN PEPTIDASE INHIBITOR, CLADE C (ANTITHROMBIN), MEMBER 1 |
| IPI00291866 | 710    | SERPING1  | SERPIN PEPTIDASE INHIBITOR, CLADE G, MEMBER 1                |
| IPI00012889 | 653509 | SFTPA1    | SURFACTANT, PULMONARY-ASSOCIATED PROTEIN A1                  |
| IPI00291878 | 6441   | SFTPD     | SURFACTANT, PULMONARY-ASSOCIATED PROTEIN D                   |
| IPI00022990 | 6779   | STATH     | STATHERIN                                                    |
| IPI00022463 | 7018   | TF        | TRANSFERRIN                                                  |
| IPI00180240 | 7117   | TMSL3     | THYMOSIN-LIKE 3                                              |
| IPI00178083 | 7170   | TPM3      | TROPOMYOSIN 3                                                |
| IPI00007750 | 7277   | TUBA1     | TUBULIN, ALPHA 1 (TESTIS SPECIFIC)                           |
| IPI00007752 | 10383  | TUBB2C    | TUBULIN, BETA 2C                                             |
| IPI00025110 | 7371   | UCK2      | URIDINE-CYTIDINE KINASE 2                                    |

## Mouse BALF Proteome

| <b>IPI</b>  | <b>Entrez Gene ID</b> | <b>Gene Symbol</b> | <b>Gene Name</b>                                                              |
|-------------|-----------------------|--------------------|-------------------------------------------------------------------------------|
| IPI00110827 | 11459                 | ACTA1              | ACTIN, ALPHA SKELETAL MUSCLE                                                  |
| IPI00122231 | 11596                 | AGER               | ADVANCED GLYCOSYLATION END PRODUCT-SPECIFIC RECEPTOR                          |
| IPI00654069 | 11606                 | AGT                | ANGIOTENSINOGEN                                                               |
| IPI00128249 | 11625                 | AHSG               | ALPHA-2-HS-GLYCOPROTEIN                                                       |
| IPI00223757 | 11677                 | AKR1B3             | ALDOSE REDUCTASE                                                              |
| IPI00131695 | 11657                 | ALB                | ALBUMIN                                                                       |
| IPI00380501 | 11668                 | ALDH1A1            | ALDEHYDE DEHYDROGENASE FAMILY 1, SUBFAMILY A1                                 |
| IPI00336362 | 26358                 | ALDH1A7            | ALDEHYDE DEHYDROGENASE FAMILY 1, SUBFAMILY A7                                 |
| IPI00230395 | 16952                 | ANXA1              | ANNEXIN A1                                                                    |
| IPI00132722 | 11745                 | ANXA3              | ANNEXIN A3                                                                    |
| IPI00353727 | 11746                 | ANXA4              | ANNEXIN A4                                                                    |
| IPI00317309 | 11747                 | ANXA5              | ANNEXIN A5                                                                    |
| IPI00377351 | 11808                 | APOA4              | APOLIPOPROTEIN A-IV                                                           |
| IPI00322312 | 192662                | ARHGDI3            | RHO GDP-DISSOCIATION INHIBITOR 1                                              |
| IPI00129519 | 70350                 | BASP1              | BRAIN ABUNDANT, MEMBRANE ATTACHED SIGNAL PROTEIN 1                            |
| IPI00113996 | 233016                | BLVRB              | BILIVERDIN REDUCTASE B (FLAVIN REDUCTASE (NADPH))                             |
| IPI00330833 | 15139                 | C5                 | COMPLEMENT C5                                                                 |
| IPI00381881 | 109828                | C7                 | COMPLEMENT COMPONENT 7                                                        |
| IPI00230641 | 12380                 | CAST               | CALPASTATIN                                                                   |
| IPI00128642 | 12409                 | CBR2               | CARBONYL REDUCTASE 2                                                          |
| IPI00387289 | 104158                | CES3               | CARBOXYLESTERASE 3                                                            |
| IPI00114065 | 14962                 | CFB                | COMPLEMENT FACTOR B                                                           |
| IPI00116945 | 11537                 | CFD                | ISOFORM 1 OF COMPLEMENT FACTOR D                                              |
| IPI00407543 | 12631                 | CFL1               | COFILIN 1, NON-MUSCLE                                                         |
| IPI00277478 | 12654                 | CHI3L1             | CHITINASE 3-LIKE 1                                                            |
| IPI00157508 | 12655                 | CHI3L3             | CHITINASE 3-LIKE 3                                                            |
| IPI00314910 | 104183                | CHI3L4             | CHITINASE-3-LIKE PROTEIN 4                                                    |
| IPI00134017 | 66917                 | CHORDC1            | CYSTEINE AND HISTIDINE-RICH DOMAIN (CHORD)-CONTAINING, ZINC-BINDING PROTEIN 1 |
| IPI00320420 | 12759                 | CLU                | CLUSTERIN                                                                     |
| IPI00315879 | 66054                 | CNDP2              | CNDP DIPEPTIDASE 2 (METALLOPEPTIDASE M20 FAMILY)                              |
| IPI00605187 | 12870                 | CP                 | CERULOPLASMIN                                                                 |
| IPI00113517 | 13030                 | CTSB               | CATHEPSIN B                                                                   |
| IPI00118987 | 13036                 | CTSH               | CATHEPSIN H                                                                   |
| IPI00125220 | 64138                 | CTSZ               | CATHEPSIN Z                                                                   |
| IPI00127942 | 56431                 | DSTN               | DESTRIN                                                                       |
| IPI00125288 | 13587                 | EAR2               | EOSINOPHIL-ASSOCIATED, RIBONUCLEASE A FAMILY, MEMBER 2                        |
| IPI00264053 | 667952                | EG667952           | SIMILAR TO NON-MUSCLE MYOSIN ALKALI LIGHT CHAIN                               |
| IPI00122684 | 13807                 | ENO2               | ENOLASE 2, GAMMA NEURONAL                                                     |
| IPI00228548 | 13808                 | ENO3               | ENOLASE 3, BETA MUSCLE                                                        |
| IPI00138342 | 13884                 | ES1                | ESTERASE 1                                                                    |
| IPI00330862 | 22350                 | EZR                | EZRIN                                                                         |
| IPI00114206 | 14061                 | F2                 | COAGULATION FACTOR II                                                         |
| IPI00126184 | 14473                 | GC                 | GROUP SPECIFIC COMPONENT                                                      |

|             |           |              |                                                                         |
|-------------|-----------|--------------|-------------------------------------------------------------------------|
| IPI00228633 | 14751     | GPI1         | GLUCOSE PHOSPHATE ISOMERASE 1                                           |
| IPI00319652 | 14775     | GPX1         | GLUTATHIONE PEROXIDASE 1                                                |
| IPI00117167 | 227753    | GSN          | GELSOLIN                                                                |
| IPI00649450 | 14862     | GSTM1        | GLUTATHIONE S-TRANSFERASE, MU 1                                         |
| IPI00338855 | 14864     | GSTM3        | GLUTATHIONE S-TRANSFERASE MU 3                                          |
| IPI00121280 | 68312     | GSTM7        | GLUTATHIONE S-TRANSFERASE, MU 7                                         |
| IPI00126208 | 15129     | HBB-B1       | HEMOGLOBIN SUBUNIT BETA-1                                               |
| IPI00409148 | 15439     | HP           | HAPTOGLOBIN                                                             |
| IPI00128484 | 15458     | HPXN         | HEMOPEXIN                                                               |
| IPI00322304 | 94175     | HRG          | HISTIDINE-RICH GLYCOPROTEIN                                             |
| IPI00123794 | 193740    | HSPA1A       | HEAT SHOCK PROTEIN 1B                                                   |
| IPI00323357 | 15481     | HSPA8        | HEAT SHOCK PROTEIN 8                                                    |
| IPI00135231 | 15926     | IDH1         | ISOCITRATE DEHYDROGENASE 1 (NADP+), SOLUBLE                             |
| IPI00308213 | 16017     | IGH-4        | IMMUNOGLOBULIN HEAVY CHAIN 4 (SERUM IGG1)                               |
| IPI00114628 | 21743     | INMT         | INDOLETHYLAMINE N-METHYLTRANSFERASE                                     |
| IPI00114958 | 16644     | KNG1         | KININOGEN 1                                                             |
| IPI00400202 | 385643    | KNG2         | KININOGEN 2 ISOFORM 1                                                   |
| IPI00319994 | 16828     | LDHA         | LACTATE DEHYDROGENASE A                                                 |
| IPI00229510 | 16832     | LDHB         | LACTATE DEHYDROGENASE B                                                 |
| IPI00115538 | 100047211 | LOC100047211 | SIMILAR TO THYMOSIN BETA-4                                              |
| IPI00230002 | 18655     | LOC432633    | PHOSPHOGLYCERATE KINASE 1                                               |
| IPI00667820 | 620515    | LOC620515    | SIMILAR TO CHITINASE 3-LIKE PROTEIN 3 PRECURSOR (SECRETORY PROTEIN YM1) |
| IPI00462605 | 676923    | LOC676923    | SIMILAR TO GLYCERALDEHYDE-3-PHOSPHATE DEHYDROGENASE                     |
| IPI00623565 | 228801    | LPLUNC1      | LONG PALATE, LUNG AND NASAL EPITHELIUM CARCINOMA-ASSOCIATED PROTEIN 1   |
| IPI00107952 | 17105     | LYZS         | LYSOZYME                                                                |
| IPI00319270 | 66905     | M6PRBP1      | MANNOSE-6-PHOSPHATE RECEPTOR BINDING PROTEIN 1                          |
| IPI00406741 | 17758     | MTAP4        | MICROTUBULE-ASSOCIATED PROTEIN 4                                        |
| IPI00123223 | 17836     | MUG1         | MURINOglobulin 1                                                        |
| IPI00128873 | 27045     | NIT1         | NITRILASE 1                                                             |
| IPI00623341 | 75416     | NOL14        | NUCLEOLAR PROTEIN 14                                                    |
| IPI00117264 | 57320     | PARK7        | PARKINSON DISEASE (AUTOSOMAL RECESSIVE, EARLY ONSET) 7                  |
| IPI00224740 | 18643     | PFN1         | PROFILIN 1                                                              |
| IPI00118757 | 75454     | PHPT1        | 14 KDA PHOSPHOHISTIDINE PHOSPHATASE                                     |
| IPI00115528 | 102866    | PLS3         | PLASTIN 3                                                               |
| IPI00124174 | 18843     | PLUNC        | PALATE, LUNG, AND NASAL EPITHELIUM CARCINOMA ASSOCIATED                 |
| IPI00112816 | 268373    | PPIA         | PEPTIDYLPROLYL ISOMERASE A                                              |
| IPI00121788 | 18477     | PRDX1        | PEROXIREDOXIN 1                                                         |
| IPI00129517 | 54683     | PRDX5        | PEROXIREDOXIN 5                                                         |
| IPI00555059 | 11758     | PRDX6        | PEROXIREDOXIN 6                                                         |
| IPI00379304 | 384001    | PRDX6-RS2    | PEROXIREDOXIN 6, RELATED SEQUENCE 2                                     |
| IPI00126194 | 11287     | PZP          | PREGNANCY ZONE PROTEIN                                                  |
| IPI00122245 | 11853     | RHOC         | RAS HOMOLOG GENE FAMILY, MEMBER C                                       |
| IPI00273803 | 66480     | RPL15        | RIBOSOMAL PROTEIN L15                                                   |
| IPI00113547 | 22287     | SCGB1A1      | SECRETOGLOBIN, FAMILY 1A, MEMBER 1 (UTEROglobin)                        |
| IPI00380873 | 380683    | SEC14L3      | SEC14-LIKE 3 (S. CEREVISIAE)                                            |
| IPI00110042 | 20341     | SELENBP1     | SELENIUM BINDING PROTEIN 1                                              |

|             |        |               |                                                                                           |
|-------------|--------|---------------|-------------------------------------------------------------------------------------------|
| IPI00129755 | 20701  | SERPINA1B     | SERINE (OR CYSTEINE) PEPTIDASE INHIBITOR, CLADE A, MEMBER 1A                              |
| IPI00123920 | 20702  | SERPINA1C     | SERINE (OR CYSTEINE) PEPTIDASE INHIBITOR, CLADE A, MEMBER 1A                              |
| IPI00123924 | 20703  | SERPINA1D     | SERINE (OR CYSTEINE) PEPTIDASE INHIBITOR, CLADE A, MEMBER 1D                              |
| IPI00123927 | 20704  | SERPINA1E     | SERINE (OR CYSTEINE) PEPTIDASE INHIBITOR, CLADE A, MEMBER 1E                              |
| IPI00131830 | 20714  | SERPINA3K     | SERINE (OR CYSTEINE) PEPTIDASE INHIBITOR, CLADE A, MEMBER 3K                              |
| IPI00136642 | 11905  | SERPINC1      | SERINE (OR CYSTEINE) PEPTIDASE INHIBITOR, CLADE C (ANTITHROMBIN), MEMBER 1                |
| IPI00282403 | 20387  | SFTPA1        | SURFACTANT ASSOCIATED PROTEIN A1                                                          |
| IPI00117975 | 20390  | SFTPD         | SURFACTANT ASSOCIATED PROTEIN D                                                           |
| IPI00130589 | 20655  | SOD1          | SUPEROXIDE DISMUTASE 1, SOLUBLE                                                           |
| IPI00129164 | 20751  | SPR           | SEPIAPTERIN REDUCTASE                                                                     |
| IPI00125778 | 21346  | TAGLN2        | TRANSGELIN 2                                                                              |
| IPI00128986 | 56370  | TAGLN3        | TRANSGELIN 3                                                                              |
| IPI00126861 | 21817  | TGM2          | TRANSGLUTAMINASE 2, C POLYPEPTIDE                                                         |
| IPI00467833 | 21991  | TPI1          | TRIOSEPHOSPHATE ISOMERASE 1                                                               |
| IPI00139788 | 22041  | TRF           | TRANSFERRIN                                                                               |
| IPI00127560 | 22139  | TTR           | TRANSTHYRETIN                                                                             |
| IPI00117348 | 22143  | TUBA2         | TUBULIN, ALPHA 2                                                                          |
| IPI00109061 | 73710  | TUBB2B        | TUBULIN, BETA 2B                                                                          |
| IPI00169463 | 227613 | TUBB2C        | TUBULIN, BETA 2C                                                                          |
| IPI00109073 | 22153  | TUBB4         | TUBULIN, BETA 4                                                                           |
| IPI00122928 | 67951  | TUBB6         | TUBULIN, BETA 6                                                                           |
| IPI00118499 | 93841  | UCHL4         | UBIQUITIN CARBOXYL-TERMINAL HYDROLASE ISOZYME L4                                          |
| IPI00405227 | 22330  | VCL           | VINCULIN                                                                                  |
| IPI00116498 | 22631  | YWHAZ         | TYROSINE 3-MONOOXYGENASE/TRYPHTOPHAN 5-MONOOXYGENASE ACTIVATION PROTEIN, ZETA POLYPEPTIDE |
| IPI00471080 | 71775  | 1300017J02RIK | RIKEN CDNA 1300017J02 GENE                                                                |
| IPI00110641 | 72275  | 2200002D01RIK | RIKEN CDNA 2200002D01 GENE                                                                |
| IPI00133557 | 67971  | 2700055K07RIK | RIKEN CDNA 2700055K07 GENE                                                                |
| IPI00222228 | 239673 | 4732456N10RIK | RIKEN CDNA 4732456N10 GENE                                                                |

### Common BALF Proteins

| Human Entrez ID | Gene Symbol | ouse Entrez ID |
|-----------------|-------------|----------------|
| 58              | ACTA1       | 11459          |
| 213             | ALB         | 11657          |
| 216             | ALDH1A1     | 11668          |
| 1072            | CFL1        | 12631          |
| 1191            | CLU         | 12759          |
| 7430            | EZR         | 22350          |
| 2638            | GC          | 14473          |
| 2934            | GSN         | 227753         |
| 3240            | HP          | 15439          |
| 3273            | HRG         | 94175          |
| 3312            | HSPA8       | 15481          |
| 3827            | KNG1        | 16644          |
| 3945            | LDHB        | 16832          |
| 5216            | PFN1        | 18643          |
| 5478            | PPIA        | 268373         |
| 5265            | SERPINA1    | 20701-4        |
| 462             | SERPINC1    | 11905          |
| 653509          | SFTPA1      | 20387          |
| 6441            | SFTPD       | 20390          |
| 7018            | TF          | 22041          |
| 10383           | TUBB2C      | 227613         |
